# Supplementary material for: Think then act or act then think?
Source: PubMed Central journal article supplement (PMC6235276; doi:10.1371/journal.pone.0206166), 2018-11-14
Supplement: pone.0206166.s003.pdf [file pone.0206166.s003.pdf]

## Think then act or act then think?

Arkadiusz Jędrzejewski, Grzegorz Marcjasz, Paul R. Nail, Katarzyna Sznajd-Weron

### Supporting information: S3 Appendix.

#### Pearson correlation coefficient derivation.

Our starting point for deriving the explicit formula for the Pearson correlation coefficient  $\rho_{S,\sigma}$  between states of public  $S$  and private  $\sigma$  opinions is its definition:

$$\rho_{S,\sigma} = \frac{\text{Cov}[S, \sigma]}{\sqrt{\text{Var}[S]\text{Var}[\sigma]}}. \quad (1)$$

After applying the formulas for the covariance

$$\text{Cov}[S, \sigma] = \text{E}[S\sigma] - \text{E}[S]\text{E}[\sigma], \quad (2)$$

and the variances of both opinions

$$\text{Var}[S] = \text{E}[S^2] - \text{E}[S]^2, \quad (3)$$

$$\text{Var}[\sigma] = \text{E}[\sigma^2] - \text{E}[\sigma]^2, \quad (4)$$

the calculations boil down to finding all the above expected values. Both opinions can take one of two possible states 1 or -1. The probabilities of these events are equal to  $\text{P}(S = 1) = c_S$  and  $\text{P}(S = -1) = 1 - c_S$ , with analogical formulas for the private opinion  $\sigma$ . Having the outcomes of our opinions and their occurrence probabilities, we can easily calculate their expected values, for the public opinion we have:

$$\text{E}[S] = \text{P}(S = 1) - \text{P}(S = -1) = 2c_S - 1, \quad (5)$$

$$\text{E}[S^2] = \text{P}(S = 1) + \text{P}(S = -1) = 1. \quad (6)$$

Hence, after taking into account Eq. (3), the variance of  $S$  has the following form

$$\text{Var}[S] = 1 - (2c_S - 1)^2 = 4c_S(1 - c_S). \quad (7)$$

Now, the last missing part is the expected value of the product of our two opinions  $\text{E}[S\sigma]$ , but since  $S$  and  $\sigma$  are not independent, we have to use our four concentrations  $c_{\uparrow\uparrow}$ ,  $c_{\uparrow\downarrow}$ ,  $c_{\downarrow\downarrow}$ , and  $c_{\downarrow\uparrow}$  that take into account the joint state of public and private opinions. Then we can write that

$\text{P}(S = 1, \sigma = 1) = c_{\uparrow\uparrow}$ , and so on for the other state combinations. Having this, one can arrive at the following formula for the expected value of the product of public and private opinions:

$$\text{E}[S\sigma] = c_{\uparrow\uparrow} - c_{\uparrow\downarrow} + c_{\downarrow\downarrow} - c_{\downarrow\uparrow}. \quad (8)$$

Using the fact that all the four concentrations must sum up to one  $c_{\uparrow\uparrow} + c_{\uparrow\downarrow} + c_{\downarrow\downarrow} + c_{\downarrow\uparrow} = 1$  and the formula for the dissonance  $d = c_{\uparrow\downarrow} + c_{\downarrow\uparrow}$ , we can express Eq. (8) in terms of the dissonance alone:

$$\text{E}[S\sigma] = 1 - 2d. \quad (9)$$

Finally, joining all the above results and using Eq. (1), we get the formula for the correlation coefficient presented in the main text

$$\rho_{S,\sigma} = \frac{c_S(1 - c_\sigma) + c_\sigma(1 - c_S) - d}{2\sqrt{c_S c_\sigma (1 - c_S)(1 - c_\sigma)}}. \quad (10)$$
